# Supplementary material for: IMM-H004 Protects against Cerebral Ischemia Injury and Cardiopulmonary Complications via CKLF1 Mediated Inflammation Pathway in Adult and Aged Rats
Source: MDPI journal article supplement (doi:10.3390/ijms20071661), 2019-04-03
Supplement: s1 [file s1]

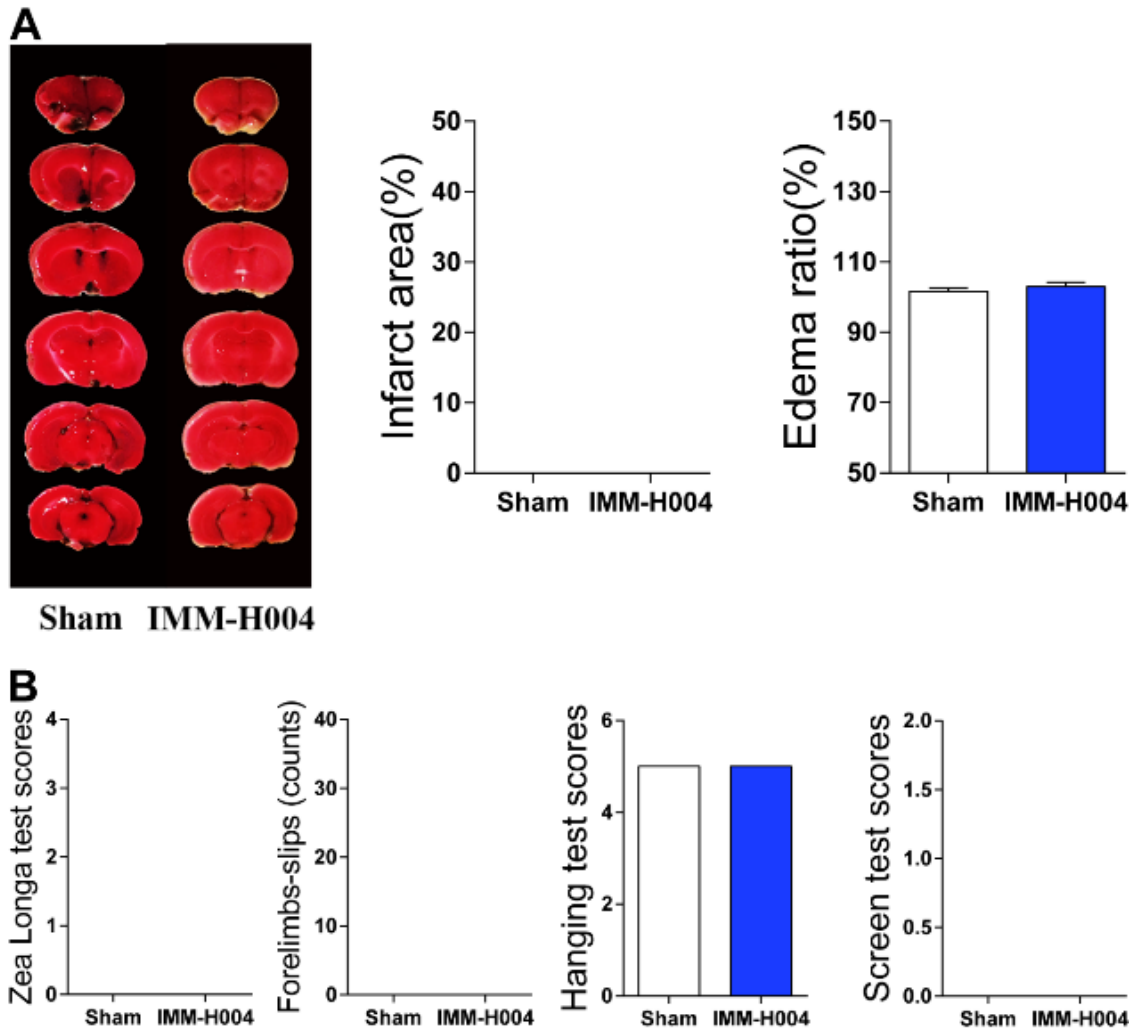

**Figure S1.** Effect of IMM-H004 on sham group rats. **(A)** Representative images of TTC staining, and analysis of infarction area and edema ratio. **(B)** Statistical analysis of the Zea Longa test scores, Forelimbs-slips, Hanging test scores, and Screen test scores. Data are shown as the mean  $\pm$  SD ( $n = 10$ /group).

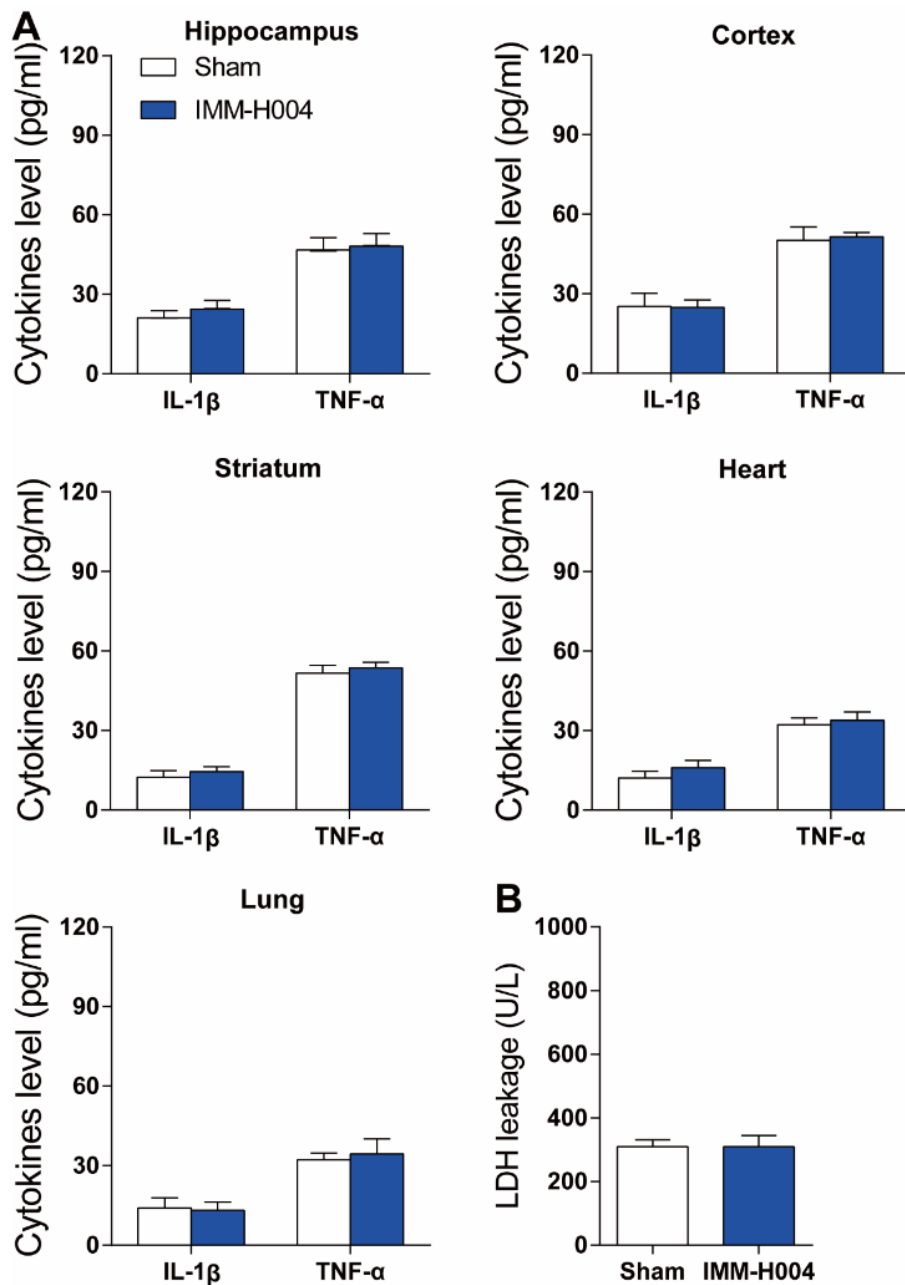

**Figure S2.** Effect of IMM-H004 on sham group rats. **(A)** Effect of IMM-H004 on IL-1 $\beta$  and TNF- $\alpha$  levels in hippocampus, cortex, striatum, heart, and lung of adult rats. **(B)** Effect of IMM-H004 on LDH level in heart of adult rats using an LDH assay kit. Data are shown as the mean  $\pm$  SD ( $n = 6$ /group).
